# Supplementary material for: Gene Expression Profiling Reveals Potential Players of Left-Right Asymmetry in Female Chicken Gonads
Source: MDPI journal article supplement (doi:10.3390/ijms18061299), 2017-06-20
Supplement: s1 [file s1]

**Table S9.** Primers used for qRT-PCR in this study.

| Gene    | Accession no.       | Sequence                                                   |
|---------|---------------------|------------------------------------------------------------|
| GHRH-LR | ENSGALG00000005242  | F: AAGGCTGCAGTGGCATTCTT<br>R: CAAAGGTCAGCAAAAGCAGTGT       |
| GCGR    | ENSGALG000000011219 | F: TGCGCTACGTCAAGCTCTTC<br>R: TCCGCCTGCACCTCCTT            |
| GABRA3  | ENSGALG000000007269 | F: CATGTGTCAGACGTCGTCGAT<br>R: CAGGCCTTAGGCGGTTATCA        |
| GABRA1  | ENSGALG000000001698 | F: CAGCTTTGGGCCTGTTTCAG<br>R: CATGGGTCCTTTGAATTTAATCTC     |
| FMO3    | ENSGALG000000003316 | F: ACGCACGGCTCCATAAGTACA<br>R: GGGCGCTTCCTTATCTTGGT        |
| FBP1    | ENSGALG000000012613 | F: TTCCATTGGGACCATATTTGG<br>R: ACCCGCTGCCACAAGATTAC        |
| FAH     | ENSGALG000000006482 | F: ACTTCTACTCGTCGCGACAACA<br>R: TACCCAACAGGCAGATGCAA       |
| ESD     | ENSGALG000000016991 | F: CAATTTTCCAACCAACCCTGAA<br>R: GCCGATACAGATTTGTACTTTCCA   |
| EDNRA   | ENSGALG000000010013 | F: GGAAGCCTTGTATTTGCGAGTT<br>R: TCCCACATCACTCCAATTGGT      |
| CPS1    | ENSGALG000000002944 | F: ACCATATCACATAGGCAGCAGTGT<br>R: GCAATTCACCACGACCGTTT     |
| CALCRL  | ENSGALG000000002632 | F: CACAGCTTCAGCCACTCAGATG<br>R: CGCTGGTGCAGTCGTGATT        |
| ALDOB   | ENSGALG000000015544 | F: GGGATCTTAGCCGCAGATGA<br>R: TTTCTCGAAAAGCACGACGAT        |
| FMO4    | ENSGALG000000021066 | F: CAGCCGTTTTTGAGGATGGA<br>R: CAAATCGACTCTTCAAGGAAGGA      |
| PSPH    | ENSGALG000000002397 | F: TGCGAAGTTCTGCGGAGTT<br>R: TCCTAGTCGTGCCGTTAAAGC         |
| DAM     | ENSGALG000000003022 | F: GTGGCCAAGTGCTCTGACTTC<br>R: ACACCAACACGGCATCAAAG        |
| AGXT    | ENSGALG000000020943 | F: CTGCCTGCTGCTTGTGGAT<br>R: GACTTTCTGGGACCCCGTGTA         |
| PHGDH   | ENSGALG000000002988 | F: CTCCTCATCTATAGAGCCAAAGCAT<br>R: GAGCTGTGGTAGGACTGGAGTTG |
| PFKL    | ENSGALG000000006543 | F: TCAGCCTGTCAGGGAACCA<br>R: TCATCGAACCTCTTCTCATCCA        |
| HTR1B   | ENSGALG000000015895 | F: TCCTCGTCTCCATCCTTGTC<br>R: TCCGAGGACAGCCAGATGTC         |
| HHRL    | ENSGALG000000004428 | F: CCTCTGTCTTCAACATCGTCCTT<br>R: ATTGCATTTCTGGTCTTCCCTTT   |
| GLP2R   | ENSGALG000000027187 | F: TGGAAAATGGAAGTGCAGGAA<br>R: TCTGAACTGTCACGCCAAATG       |

---

|        |                    |                                                     |
|--------|--------------------|-----------------------------------------------------|
| CVH    | ENSGALG00000014713 | F: AGGCGTGGATGGCTAACTCT<br>R: CCAGAACTCCTCCCTCTACCA |
| PITX2  | ENSGALG00000026881 | F: CAGAGCATGTTCTCCCCTCC<br>R: TAAACGTATGGAGGCGTCGG  |
| TDRD5  | ENSGALG00000004138 | F: GTTTGCCTCCAAAGGGCAAG<br>R: TGTGTGTACTGGAACGTCCG  |
| SLC1A3 | ENSGALG00000003582 | F: ATGGGAGTCCGAGCAGTAGT<br>R: TGGATGTGTCATTGGACGGG  |
| PIWIL1 | ENSGALG00000002645 | F: GAAGAGCTAGAGCCAGAGCG<br>R: TTGCCGCTGTTCAGATGGAT  |
| PITX3  | ENSGALG00000005613 | F: TCCTACAACAACCTGGGCCAC<br>R: GTTGAGGCTCGGGCTATTCA |
| GDF8   | ENSGALG00000023961 | F: CATGAACCCAGGCACTGGTA<br>R: AAATCTCTGCGGGACCGTTT  |
| G0S2   | ENSGALG00000023933 | F: CCAAAGAGATGCTCAGCCAGA<br>R: CAAATCCTCCCGCTTCCGAG |

---
